# Supplementary material
Source: PubMed Central journal article supplement (PMC4270391)
Supplement: es5055379_si_001.pdf [file es5055379_si_001.pdf]

1 **Supporting Information**

2 **Global Health Impacts of Future Aviation Emissions under Alternative Control Scenarios**

3 Haruka Morita<sup>1\*</sup>, Suijia Yang<sup>1</sup>, Nadine Unger<sup>2</sup>, and Patrick L. Kinney<sup>1</sup>

4 Affiliations:

5 <sup>1</sup> Mailman School of Public Health, Columbia University, 722 West 168<sup>th</sup> Street, New York, NY  
6 10032

7 <sup>2</sup> School of Forestry and Environmental Studies, Yale University, 195 Prospect Street, New  
8 Haven, CT 06511

9

10 Pages S4-11 includes the following Tables and Figures:

11 Table S1. Volpe AEDT global aviation emission inventories.

12 Table S2. Non-aviation anthropogenic sector emission sources of short-lived trace gas and  
13 aerosol precursors in 2005 (and 2050 in brackets) from IPCC AR5 RCP4.5

14 Table S3. Excess mortality using the old RR function (ages  $\geq 25$  years, CIESIN population)

15 Table S4. Excess mortality using the old RR function (all ages, CIESIN population)

16 Table S5. Excess mortality due to emissions from aviation sector (ages  $\geq 25$  years, CIESIN and  
17 GBD adjusted population)

18 Table S6. Excess mortality due to emissions from aviation sector (all ages, CIESIN and GBD  
19 adjusted population)

20 Table S7. Total Excess mortality (ages  $\geq 25$  years, CIESIN and GBD adjusted population)

21 Table S8. Total Excess mortality (all ages, CIESIN and GBD adjusted population)

22 Figure S1: Global Distribution of PM<sub>2.5</sub> Concentration Attributable to Aviation Sector (2006  
23 Baseline)

- 24 Figure S2: Global Distribution of  $PM_{2.5}$  Concentration Attributable to Aviation Sector (2050 ref)
- 25 Figure S3: Global Distribution of  $PM_{2.5}$  Concentration Attributable to Aviation Sector (2050 Tech
- 26 & Op)
- 27 Figure S4: Global Distribution of  $PM_{2.5}$  Concentration Attributable to Aviation Sector (2050 Alt
- 28 Fuel

## 29 **Supporting Information**

30 Results from the three sensitivity analyses are presented here.

### 31 Impact of different exposure response function models

32 Results of sensitivity analyses where we used the RR function from the previous American  
33 Cancer Society study as opposed to the new curves are shown in Tables S3 and S4, with  
34 otherwise the same assumptions as in Table 3. All mortality estimates for 2006 and 2050 in  
35 Tables S3-8 were calculated using present day population for both 2006 and 2050. The lower and  
36 upper bounds for each estimate were calculated using the lower and upper bounds of each of the  
37 three parameters (Table 1) in the health impact calculations. Tables S3 and S4 compare with  
38 Tables S5 and S6, which show results using the IER function; the right columns of Table S5  
39 under each scenario are the results presented in Table 2.

40 In 2006, the estimated excess mortality for adults 25 years and older due to PM<sub>2.5</sub> emissions  
41 attributable to the aviation sector is 395 deaths with the old exposure response function (Table  
42 S3) and 393 deaths with the IER function (Table S5), while the mortality estimate for all ages is  
43 396 (Table S4) and 393 deaths (Table S8) using the old and new model respectively. Total excess  
44 mortality for adults over 25 years and older from all emission sectors in 2006 is 20.4 million  
45 (Table S3) and 1.90 million deaths (Table S7) from the old and new model, respectively. The  
46 excess mortality estimates are higher using the old function in 2006. This relationship holds true  
47 for total mortality estimates attributable to all emission sectors in the three 2050 scenarios. For  
48 example, under the Alt Fuel scenario, total excess mortality for adults 25 years and older 1.59  
49 million (Table S3) and 1.42 million deaths (Table S7) for the old and new function, respectively.  
50 However, the new IER function yields higher mortality estimates for the 2050 scenarios for  
51 aviation sector attributable PM<sub>2.5</sub>-related mortality. Under the Alt Fuel scenario, excess mortality

52 for adults 25 years and older is 927 deaths (Table S3) and 1562 deaths (Table S5) for the old and  
53 new function, respectively. This could be due to the  $50 \mu\text{g}/\text{cm}^3$  high concentration threshold,  
54 since we subtract the non-aviation concentration from the total to get the aviation contribution,  
55 there will be no contribution from the aviation sector in those very polluted regions (with  
56 concentration above  $50\mu\text{g}/\text{cm}^3$ ) when applying the high concentration threshold.

57

#### 58 Impact of different population sources

59 In Tables S5-8, each scenario (i.e. 2006 Baseline, Reference, Tech Operation and  
60 Improvement, and Alternative Fuel) has two columns. The left columns are results based on the  
61 CIESIN gridded population of the world in 2010. The right columns (Year\_Adj) show results  
62 after matching the CIESIN population data to the GBD regional population estimates.

63 The estimates using the CIESIN population data are slightly smaller than those using the  
64 GBD regional population data. This could be due to several factors. First, the CIESIN and GBD  
65 regional population data vary slightly such that a small fraction of the global population is lost to  
66 bodies of water using the CIESIN data, and the fraction of the population lost varied by the  
67 population data resolution. With a population data resolution of  $2.5' \times 2.5'$  and  $1^\circ \times 1^\circ$  (not  
68 reported), the loss was about 2% and 6%, respectively. This minor population loss could have  
69 yielded the smaller mortality estimates using the CIESIN data. Secondly, the total population  
70 estimates from the GBD and CIESIN data were adjusted by multiplying the ratio of population  
71 difference between the two dataset within the same region. The population ratio variance was  
72 greater than 1 in some regions and less than 1 in others; however, we observed an overall greater  
73 mortality estimates obtained using the GBD population. We believe this is due to the 2% loss  
74 observed in the  $2.5' \times 2.5'$  resolution population data (data not shown).

75 Further, the GBD regional population data do not include the countries that are not WHO  
76 Member States. However, the total population estimates using the GBD and CIESIN data are 6.9  
77 and 6.8 billion, respectively. We believe that the exclusion of non-Member states did not impact  
78 the mortality estimates as they are mostly tourist countries.

79 Comparing the CIESIN population data to the GBD population data, in 2006, PM<sub>2.5</sub>  
80 emissions from the aviation sector resulted in an estimated 405 excess deaths in adults 25 years  
81 or older (Table S5), a difference of 3.2% from the CIESIN data estimate of 392 deaths. All of the  
82 mortality estimates obtained using the adjusted population were, on average, 2.8% greater than  
83 those using the unadjusted CIESIN data. The adjusted results are more directly comparable to  
84 other studies that employ the GBD regional population estimates.

85

#### 86 Mortality difference between all ages and adults 25 years and older

87 Our analysis suggests that including all ages or just adults 25 years and older yields similar  
88 excess mortality estimates. Tables S5 and S6 show PM<sub>2.5</sub>-related mortality estimates attributable  
89 to the aviation sector for adults 25 years and older and all ages, respectively, and Tables S7 and  
90 S8 show mortality estimates attributable to all emission sectors for the two age groups.

91 Corresponding values in each of the two pairs of tables are very similar. In Table S3, mortality  
92 estimate for adults 25 years or older under the 2006 Baseline scenario using CIESIN population  
93 is 392 deaths, and in Table S6, the corresponding estimate for all ages is 393 deaths. The similar  
94 estimates obtained from the two analyses are most probably due to the fact that cardiorespiratory  
95 outcomes that we analyzed are health outcomes common among adults. Therefore, the inclusion  
96 of those under 25 years old did not alter the mortality estimates significantly.

97 Table S1. Volpe Aviation Environmental Design Tool (AEDT) global aviation emission  
 98 inventories.

| Emission                                | 2006  | 2050  |           |       |
|-----------------------------------------|-------|-------|-----------|-------|
|                                         |       | Ref   | Tech & Op | Alt   |
| NO <sub>x</sub> (TgN/yr)                | 0.812 | 3.95  | 1.57      | 1.57  |
| SO <sub>2</sub> (TgSO <sub>2</sub> /yr) | 0.221 | 1.06  | 0.604     | 0.0   |
| Sulfate (Gg/yr)                         | 6.78  | 32.51 | 18.52     | 0.0   |
| BC (Gg/yr)                              | 5.96  | 29.04 | 16.56     | 8.3   |
| OC (Gg/yr)                              | 6.62  | 27.52 | 15.75     | 15.75 |
| CO (Tg/yr)                              | 0.676 | 2.50  | 1.42      | 1.42  |
| Alkenes (Gg/yr)                         | 2.698 | 5.90  | 3.35      | 3.35  |
| Paraffin (Gg/yr)                        | 1.437 | 3.15  | 1.78      | 1.78  |
| CO <sub>2</sub> (Tg/yr)                 | 594   | 2852  | 1625      | 1625  |
| H <sub>2</sub> O (Tg/yr)                | 232   | 1111  | 633       | 633   |

99 Shows individual species of global aviation emission inventories under the four scenarios used in  
 100 this study.

101 Table S2. Non-aviation anthropogenic sector emission sources in 2005 (and 2050 in brackets)

|                                       | NO <sub>x</sub><br>(TgNO <sub>2</sub> /yr) | CO<br>(TgCO/yr)   | SO <sub>2</sub><br>(TgSO <sub>2</sub> /yr) | NMVOC<br>(Tg/yr) | BC<br>(Tg/yr)  | OC<br>(Tg/yr)    | NH <sub>3</sub><br>(TgNH <sub>3</sub> /yr) |
|---------------------------------------|--------------------------------------------|-------------------|--------------------------------------------|------------------|----------------|------------------|--------------------------------------------|
| Residential/<br>Commercial            | 10.2<br>(8.9)                              | 259.3<br>(215.8)  | 9.0<br>(5.1)                               | 39.9<br>(29.50)  | 2.23<br>(1.61) | 8.56<br>(5.68)   | 0.35<br>(0.33)                             |
| Energy                                | 24.4<br>(10.4)                             | 24.9<br>(37.9)    | 60.4<br>(14.3)                             | 27.5<br>(30.0)   | 0.07<br>(0.08) | 0.47<br>(0.37)   | 0.03<br>(0.02)                             |
| Industry                              | 15.0<br>(10.2)                             | 95.4<br>(126.9)   | 27.3<br>(17.3)                             | 8.8<br>(7.2)     | 1.60<br>(0.89) | 2.37<br>(1.62)   | 0.16<br>(0.24)                             |
| Shipping                              | 18.7<br>(20.4)                             | 1.2<br>(1.4)      | 11.1<br>(6.7)                              | 3.2<br>(4.3)     | 0.14<br>(0.20) | 0.15<br>(0.21)   | N/A                                        |
| Surf trans                            | 35.5<br>(23.2)                             | 231.0<br>(154.0)  | 4.6<br>(5.2)                               | 35.0<br>(40.4)   | 1.43<br>(1.32) | 1.60<br>(1.42)   | 0.48<br>(0.30)                             |
| Waste                                 | 0.3<br>(0.1)                               | 4.0<br>(2.3)      | 0.05<br>(0.04)                             | 1.6<br>(1.4)     | 0.04<br>(0.04) | 0.05<br>(0.05)   | N/A                                        |
| Agricultural<br>waste burning         | 0.7<br>(0.8)                               | 20.6<br>(21.1)    | 0.2<br>(0.2)                               | 2.8<br>(2.7)     | 0.15<br>(0.16) | 0.74<br>(0.76)   | 0.70<br>(0.86)                             |
| Savannah<br>burning                   | 11.5<br>(9.7)                              | 221.3<br>(185.8)  | 1.5<br>(1.2)                               | 35.0<br>(29.3)   | 1.48<br>(1.25) | 10.82<br>(9.12)  | 4.14<br>(3.37)                             |
| Land-use<br>change<br>(deforestation) | 6.0<br>(3.8)                               | 233.1<br>(127.2)  | 2.2<br>(1.1)                               | 42.5<br>(22.6)   | 1.11<br>(0.63) | 12.09<br>(7.59)  | 6.87<br>(3.17)                             |
| Agriculture<br>Animals/rice           | 2.2<br>(2.9)                               | N/A               | N/A                                        | 0.9<br>(1.0)     | N/A            | N/A              | 37.91<br>(48.19)                           |
| Solvents                              | N/A                                        | 0.6<br>(0.4)      | N/A                                        | 22.4<br>(22.4)   | N/A            | N/A              | N/A                                        |
| Total                                 | 127.5<br>(95.6)                            | 1091.6<br>(872.7) | 116.4<br>(51.4)                            | 219.5<br>(190.6) | 8.26<br>(6.18) | 36.85<br>(26.81) | 50.6<br>(56.5)                             |

102 Shows non-aviation anthropogenic sector emission sources of short-lived trace gas and aerosol  
 103 precursors in 2005 and 2050 in brackets from IPCC Fifth Assessment Report RCP4.5.

104

| Total Excess Mortality                       |             | 2006 Baseline |          | 2050 Reference |          | 2050 Tech & Operation |          | 2050 Alt Fuel |          |
|----------------------------------------------|-------------|---------------|----------|----------------|----------|-----------------------|----------|---------------|----------|
|                                              |             | Total         | Aviation | Total          | Aviation | Total                 | Aviation | Total         | Aviation |
| Ischemic Heart Disease (IHD)                 | Upper bound | 1535989.73    | 339.14   | 1206254.13     | 2901.80  | 1204601.72            | 1249.39  | 1204133.65    | 781.32   |
|                                              | Central     | 1315399.82    | 268.96   | 1042720.40     | 2281.60  | 1041428.52            | 989.73   | 1041032.83    | 594.03   |
|                                              | Lower bound | 998853.13     | 188.32   | 798769.04      | 1590.36  | 797874.38             | 695.70   | 797576.90     | 398.22   |
| Stroke                                       | Upper bound | 474064.05     | 107.83   | 345878.37      | 1141.66  | 345220.22             | 483.51   | 345052.07     | 315.36   |
|                                              | Central     | 305564.43     | 62.21    | 225139.96      | 664.75   | 224758.69             | 283.49   | 224653.21     | 178.01   |
|                                              | Lower bound | 33496.82      | 5.94     | 24938.74       | 64.97    | 24901.73              | 27.96    | 24890.46      | 16.69    |
| Chronic Obstructive Pulmonary Disease (COPD) | Upper bound | 600134.87     | 49.37    | 511482.45      | 474.64   | 511231.45             | 223.63   | 511075.06     | 67.24    |
|                                              | Central     | 238686.59     | 16.15    | 203401.31      | 164.24   | 203316.96             | 79.89    | 203253.30     | 16.23    |
|                                              | Lower bound | -319364.84    | -17.20   | -272185.00     | -190.80  | -272090.54            | -96.34   | -272003.19    | -8.99    |
| Lung Cancer (LC)                             | Upper bound | 241392.08     | 71.22    | 163060.81      | 726.13   | 162638.77             | 304.09   | 162540.53     | 205.86   |
|                                              | Central     | 177314.95     | 47.58    | 119735.66      | 496.53   | 119447.87             | 208.75   | 119377.41     | 138.28   |
|                                              | Lower bound | 91548.19      | 22.06    | 61808.31       | 238.05   | 61670.78              | 100.52   | 61635.21      | 64.95    |
| Total                                        | Upper bound | 2851580.73    | 567.56   | 2226675.76     | 5244.23  | 2223692.16            | 2260.62  | 2222801.31    | 1369.78  |
|                                              | Central     | 2036965.79    | 394.9    | 1590997.33     | 3607.12  | 1588952.04            | 1561.86  | 1588316.75    | 926.55   |
|                                              | Lower bound | 804533.3      | 199.12   | 613331.09      | 1702.58  | 612356.35             | 727.84   | 612099.38     | 470.87   |

105 Table S3. Excess mortality using the old RR function (ages  $\geq 25$  years, CIESIN population)



106 Shows excess mortality in adults 25 and older due to  $PM_{2.5}$  from the all emission sectors (left column labeled “total” under each scenario) and the  
107 aviation sector for four outcomes under the four scenarios using the old function and CIESIN population data.

108 Table S4. Excess mortality using the old RR function (all ages, CIESIN population)

| Total Excess Mortality                       |             | 2006 Baseline |          | 2050 Ref   |          | 2050 Tech & Operation |          | 2050 Alt Fuel |          |
|----------------------------------------------|-------------|---------------|----------|------------|----------|-----------------------|----------|---------------|----------|
|                                              |             | Total         | Aviation | Total      | Aviation | Total                 | Aviation | Total         | Aviation |
| Ischemic Heart Disease (IHD)                 | Upper bound | 1553231.28    | 339.96   | 1222680.27 | 2906.86  | 1221025.64            | 1252.23  | 1220554.41    | 781.00   |
|                                              | Central     | 1330459.08    | 269.64   | 1057087.09 | 2285.60  | 1055793.55            | 992.06   | 1055395.02    | 593.54   |
|                                              | Lower bound | 1010501.62    | 188.82   | 809896.09  | 1593.16  | 809000.35             | 697.42   | 808700.61     | 397.69   |
| Stroke                                       | Upper bound | 476598.01     | 107.97   | 348295.17  | 1142.59  | 347636.59             | 484.01   | 347467.95     | 315.37   |
|                                              | Central     | 307246.90     | 62.30    | 226747.57  | 665.30   | 226366.06             | 283.79   | 226260.25     | 177.99   |
|                                              | Lower bound | 33687.12      | 5.95     | 25120.93   | 65.03    | 25083.89              | 27.99    | 25072.59      | 16.69    |
| Chronic Obstructive Pulmonary Disease (COPD) | Upper bound | 609699.72     | 49.60    | 520891.47  | 474.84   | 520640.79             | 224.16   | 520482.80     | 66.16    |
|                                              | Central     | 242549.59     | 16.24    | 207201.53  | 164.29   | 207117.34             | 80.10    | 207052.99     | 15.75    |
|                                              | Lower bound | -324612.54    | -17.34   | -277347.65 | -190.84  | -277253.45            | -96.64   | -277165.09    | -8.28    |
| Lung Cancer (LC)                             | Upper bound | 241934.60     | 71.26    | 163513.93  | 726.63   | 163091.62             | 304.33   | 162993.23     | 205.94   |
|                                              | Central     | 177718.82     | 47.61    | 120072.97  | 496.88   | 119785.00             | 208.91   | 119714.42     | 138.33   |
|                                              | Lower bound | 91759.53      | 22.07    | 61984.86   | 238.22   | 61847.24              | 100.60   | 61811.61      | 64.97    |
| Total                                        | Upper bound | 2881463.61    | 568.79   | 2255380.84 | 5250.92  | 2252394.64            | 2264.73  | 2251498.39    | 1368.47  |
|                                              | Central     | 2057974.39    | 395.79   | 1611109.16 | 3612.07  | 1609061.95            | 1564.86  | 1608422.68    | 925.61   |
|                                              | Lower bound | 811335.73     | 199.5    | 619654.23  | 1705.57  | 618678.03             | 729.37   | 618419.72     | 471.07   |

109 Shows excess mortality for all ages due to PM<sub>2.5</sub> from the all emission sectors (left column labeled “total” under each scenario) and the aviation sector

110 for four outcomes under the four scenarios using the old function and CIESIN population data.

|                          |               |     |           |          |
|--------------------------|---------------|-----|-----------|----------|
| Over 25 Excess Mortality | 2006 Baseline | Ref | Tech & Op | Alt Fuel |
|--------------------------|---------------|-----|-----------|----------|

111 Table S5. Excess mortality due to emissions from aviation sector (ages  $\geq 25$  years, CIESIN and GBD adjusted population)

|                                              |             | 2006   | 2006_Adj | 2050    | 2050_Adj | 2050    | 2050_Adj | 2050    | 2050_Adj |
|----------------------------------------------|-------------|--------|----------|---------|----------|---------|----------|---------|----------|
| Ischemic Heart Disease (IHD)                 | Upper bound | 316.63 | 328.24   | 3294.06 | 3406.07  | 1398.45 | 1444.88  | 956.74  | 990.50   |
|                                              | Central     | 186.43 | 191.62   | 2851.24 | 2934.68  | 1182.55 | 1208.05  | 814.96  | 829.38   |
|                                              | Lower bound | 119.93 | 123.18   | 1879.72 | 1928.76  | 771.01  | 781.77   | 518.94  | 522.17   |
| Stroke                                       | Upper bound | 187.28 | 193.83   | 1939.89 | 1998.20  | 807.63  | 831.68   | 569.92  | 587.79   |
|                                              | Central     | 131.92 | 136.13   | 1674.13 | 1724.54  | 700.54  | 721.28   | 501.64  | 517.01   |
|                                              | Lower bound | 37.60  | 38.67    | 572.97  | 589.30   | 239.25  | 245.29   | 169.03  | 173.13   |
| Chronic Obstructive Pulmonary Disease (COPD) | Upper bound | 56.29  | 58.38    | 572.01  | 590.31   | 252.20  | 259.99   | 132.30  | 136.86   |
|                                              | Central     | 34.57  | 35.92    | 335.77  | 346.41   | 150.53  | 155.16   | 70.61   | 73.11    |
|                                              | Lower bound | 12.53  | 13.07    | 108.45  | 111.74   | 51.18   | 52.70    | 15.38   | 15.95    |
| Lung Cancer (LC)                             | Upper bound | 64.40  | 67.13    | 817.91  | 846.14   | 340.48  | 351.98   | 246.23  | 254.99   |
|                                              | Central     | 39.09  | 40.85    | 467.81  | 483.90   | 195.39  | 202.01   | 137.82  | 142.82   |
|                                              | Lower bound | 7.09   | 7.47     | 77.76   | 80.34    | 33.16   | 34.24    | 20.43   | 21.18    |
| Total                                        | Upper bound | 624.6  | 647.58   | 6623.87 | 6840.72  | 2798.76 | 2888.53  | 1905.19 | 1970.14  |
|                                              | Central     | 392.01 | 404.52   | 5328.95 | 5489.53  | 2229.01 | 2286.5   | 1525.03 | 1562.32  |
|                                              | Lower bound | 177.15 | 182.39   | 2638.9  | 2710.14  | 1094.6  | 1114     | 723.78  | 732.43   |

112 Shows excess mortality for adults 25 years and older due to PM<sub>2.5</sub> from the aviation sector for four outcomes under the four scenarios. The left column  
113 under each scenario are mortality estimates obtained using the CIESIN population. The right column (\_Adj) are mortality estimates obtained using the  
114 GBD adjusted population.



|                        |               |     |           |          |
|------------------------|---------------|-----|-----------|----------|
| Total Excess Mortality | 2006 Baseline | Ref | Tech & Op | Alt Fuel |
|------------------------|---------------|-----|-----------|----------|

116 Table S6. Excess mortality due to emissions from aviation sector (all ages, CIESIN and GBD adjusted population)

|                                              |             | 2006   | 2006_Adj | 2050    | 2050_Adj | 2050    | 2050_Adj | 2050    | 2050_Adj |
|----------------------------------------------|-------------|--------|----------|---------|----------|---------|----------|---------|----------|
| Ischemic Heart Disease (IHD)                 | Upper bound | 317.53 | 329.13   | 3300.14 | 3412.17  | 1401.49 | 1447.94  | 957.27  | 990.99   |
|                                              | Central     | 187.01 | 192.18   | 2855.63 | 2938.99  | 1184.36 | 1209.77  | 815.16  | 829.45   |
|                                              | Lower bound | 120.31 | 123.55   | 1882.47 | 1931.43  | 772.05  | 782.71   | 518.87  | 521.96   |
| Stroke                                       | Upper bound | 187.52 | 194.07   | 1941.48 | 1999.78  | 808.40  | 832.46   | 570.12  | 587.98   |
|                                              | Central     | 132.12 | 136.32   | 1675.45 | 1725.86  | 701.17  | 721.91   | 501.82  | 517.18   |
|                                              | Lower bound | 37.67  | 38.73    | 573.42  | 589.74   | 239.45  | 245.49   | 169.07  | 173.16   |
| Chronic Obstructive Pulmonary Disease (COPD) | Upper bound | 56.59  | 58.69    | 573.04  | 591.34   | 252.90  | 260.69   | 131.90  | 136.44   |
|                                              | Central     | 34.79  | 36.15    | 336.46  | 347.09   | 151.01  | 155.65   | 70.29   | 72.77    |
|                                              | Lower bound | 12.65  | 13.20    | 108.78  | 112.08   | 51.43   | 52.96    | 15.19   | 15.76    |
| Lung Cancer (LC)                             | Upper bound | 64.44  | 67.18    | 818.45  | 846.69   | 340.72  | 352.22   | 246.34  | 255.10   |
|                                              | Central     | 39.12  | 40.88    | 468.14  | 484.23   | 195.54  | 202.16   | 137.88  | 142.88   |
|                                              | Lower bound | 7.10   | 7.47     | 77.83   | 80.41    | 33.19   | 34.27    | 20.44   | 21.19    |
| Total                                        | Upper bound | 626.08 | 649.07   | 6633.11 | 6849.98  | 2803.51 | 2893.31  | 1905.63 | 1970.51  |
|                                              | Central     | 393.04 | 405.53   | 5335.68 | 5496.17  | 2232.08 | 2289.49  | 1525.15 | 1562.28  |
|                                              | Lower bound | 177.73 | 182.95   | 2642.5  | 2713.66  | 1096.12 | 1115.43  | 723.57  | 732.07   |

117 Shows excess mortality for all ages due to PM<sub>2.5</sub> from the aviation sector for four outcomes under the four scenarios. The left column under each  
118 scenario are mortality estimates obtained using the CIESIN population. The right column (\_Adj) are mortality estimates obtained using the GBD  
119 adjusted population.





121 Table S7. Total excess mortality (ages  $\geq 25$  years, CIESIN and GBD adjusted population)

| Over 25 Excess Mortality Adjusted            |             | 2006 Baseline |            | Red        |            | Tech & Op  |            | Alt Fuel   |            |
|----------------------------------------------|-------------|---------------|------------|------------|------------|------------|------------|------------|------------|
|                                              |             | 2006          | 2006_Adj   | 2050       | 2050_Adj   | 2010       | 2010_Adj   | 2050       | 2050A_Adj  |
| Ischemic Heart Disease (IHD)                 | Upper bound | 1307246.03    | 1339669.05 | 998798.77  | 1023530.38 | 996903.15  | 1021569.19 | 996461.44  | 1021114.81 |
|                                              | Central     | 994539.77     | 1019806.16 | 734477.81  | 753213.14  | 732809.10  | 751486.50  | 731626.56  | 751107.84  |
|                                              | Lower bound | 686833.88     | 704306.98  | 508140.58  | 521137.06  | 507031.87  | 519990.06  | 506779.80  | 519730.46  |
| Stroke                                       | Upper bound | 603822.71     | 618437.57  | 428163.03  | 438730.91  | 427030.76  | 437564.40  | 426793.05  | 437320.51  |
|                                              | Central     | 481174.48     | 492940.79  | 341222.77  | 349758.67  | 340249.18  | 348755.41  | 339548.64  | 348551.14  |
|                                              | Lower bound | 172068.41     | 176324.58  | 123258.24  | 126392.05  | 122924.51  | 126048.05  | 122854.30  | 125975.88  |
| Chronic Obstructive Pulmonary Disease (COPD) | Upper bound | 449311.80     | 461040.33  | 389576.86  | 400067.47  | 389257.05  | 399737.15  | 389137.15  | 399614.02  |
|                                              | Central     | 296923.17     | 304694.55  | 257949.93  | 264942.54  | 257764.68  | 264751.29  | 257614.15  | 264669.24  |
|                                              | Lower bound | 129509.66     | 132932.02  | 113323.79  | 116447.33  | 113266.53  | 116388.30  | 113230.72  | 116351.55  |
| Lung Cancer (LC)                             | Upper bound | 198910.03     | 203668.24  | 138789.94  | 142090.86  | 138312.51  | 141596.70  | 138218.26  | 141499.70  |
|                                              | Central     | 128799.98     | 131810.69  | 89874.13   | 91977.38   | 89601.70   | 91695.49   | 89406.31   | 91636.30   |
|                                              | Lower bound | 33326.19      | 34068.36   | 23698.12   | 24240.01   | 23653.52   | 24193.91   | 23640.79   | 24180.85   |
| Total                                        | Upper bound | 2559290.57    | 2622815.19 | 1955328.6  | 2004419.62 | 1951503.47 | 2000467.44 | 1950609.9  | 1999549.04 |
|                                              | Central     | 1901437.4     | 1949252.19 | 1423524.64 | 1459891.73 | 1420424.66 | 1456688.69 | 1418195.66 | 1455964.52 |
|                                              | Lower bound | 1021738.14    | 1047631.94 | 768420.73  | 788216.45  | 766876.43  | 786620.32  | 766505.61  | 786238.74  |

122 Shows excess mortality for adults 25 years and older due to PM<sub>2.5</sub> from all emission sectors for four outcomes under the four scenarios. The left column

123 under each scenario are mortality estimates obtained using the CIESIN population. The right column (\_Adj) are mortality estimates obtained using the  
124 GBD adjusted population.

125

| Total Excess Mortality Adjusted              |             | 2006 Baseline |            | Ref        |            | Tech & Op  |            | Alt Fuel   |            |
|----------------------------------------------|-------------|---------------|------------|------------|------------|------------|------------|------------|------------|
|                                              |             | 2006          | 2006_Adj   | 2050       | 2050_Adj   | 2010       | 2010_Adj   | 2050       | 2050_Adj   |
| Ischemic Heart Disease (IHD)                 | Upper bound | 1320951.85    | 1353769.11 | 1011818.47 | 1036930.62 | 1009919.81 | 1034966.38 | 1009475.59 | 1034509.44 |
|                                              | Central     | 1004009.61    | 1029543.98 | 743419.61  | 762412.11  | 741748.34  | 760682.88  | 740563.97  | 760302.56  |
|                                              | Lower bound | 693368.99     | 711027.15  | 514313.28  | 527487.42  | 513202.86  | 526338.69  | 512949.68  | 526077.95  |
| Stroke                                       | Upper bound | 606789.11     | 621484.41  | 430978.21  | 441623.88  | 429845.12  | 440456.55  | 429606.84  | 440212.08  |
|                                              | Central     | 483495.05     | 495323.83  | 343424.94  | 352021.36  | 342450.66  | 351017.41  | 341749.49  | 350812.67  |
|                                              | Lower bound | 172896.59     | 177175.01  | 124045.31  | 127200.74  | 123711.34  | 126856.50  | 123640.96  | 126784.17  |
| Chronic Obstructive Pulmonary Disease (COPD) | Upper bound | 456337.87     | 468298.60  | 396489.70  | 407211.01  | 396169.56  | 406880.36  | 396048.56  | 406756.11  |
|                                              | Central     | 301677.97     | 309607.83  | 262632.49  | 269782.65  | 262447.05  | 269591.21  | 262296.04  | 269508.33  |
|                                              | Lower bound | 131698.62     | 135195.11  | 115483.41  | 118680.74  | 115426.06  | 118621.62  | 115389.82  | 118584.42  |
| Lung Cancer (LC)                             | Upper bound | 199341.15     | 204108.75  | 139158.17  | 142467.18  | 138680.44  | 141972.71  | 138586.06  | 141875.59  |
|                                              | Central     | 129091.37     | 132108.45  | 90123.16   | 92231.92   | 89850.55   | 91949.85   | 89655.01   | 91890.57   |
|                                              | Lower bound | 33411.36      | 34155.43   | 23771.79   | 24315.35   | 23727.15   | 24269.22   | 23714.40   | 24256.14   |
| Total                                        | Upper bound | 2583419.98    | 2647660.87 | 1978444.55 | 2028232.69 | 1974614.93 | 2024276    | 1973717.05 | 2023353.22 |
|                                              | Central     | 1918274       | 1966584.09 | 1439600.2  | 1476448.04 | 1436496.6  | 1473241.35 | 1434264.51 | 1472514.13 |
|                                              | Lower bound | 1031375.56    | 1057552.7  | 777613.79  | 797684.25  | 776067.41  | 796086.03  | 775694.86  | 795702.68  |

126 Table S8. Total excess mortality (all ages, CIESIN and GBD adjusted population)

127 Shows excess mortality for all ages due to  $PM_{2.5}$  from all emission sectors for four outcomes under the four scenarios. The left column under each  
128 scenario are mortality estimates obtained using the CIESIN population. The right column (\_Adj) are mortality estimates obtained using the GBD  
129 adjusted population.

130 Figure S1. Global Distribution of PM<sub>2.5</sub> Concentration Attributable to Aviation Sector (2006)

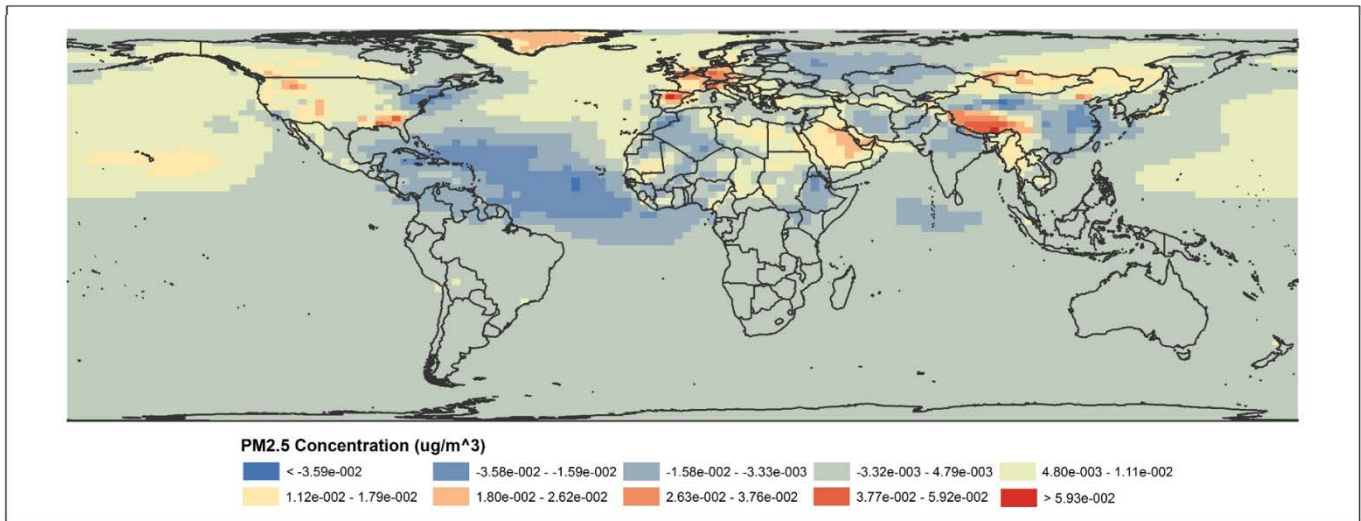

131 Baseline)

132 Shows global distribution of PM<sub>2.5</sub> concentrations due to aviation sector emissions. Much of the  
133 Atlantic Ocean, northwestern Africa, eastern China, Middle Eastern regions, and western Russia  
134 have negative PM<sub>2.5</sub> concentration values. The Pacific and Arctic Ocean, northeastern Africa,  
135 North America, western China, western European regions, and eastern Russia have higher PM<sub>2.5</sub>  
136 concentrations in 2006. Australia and South America have low PM<sub>2.5</sub> concentration levels.

137 Figure S2. Global Distribution of PM<sub>2.5</sub> Concentration Attributable to Aviation Sector (2050 Ref)

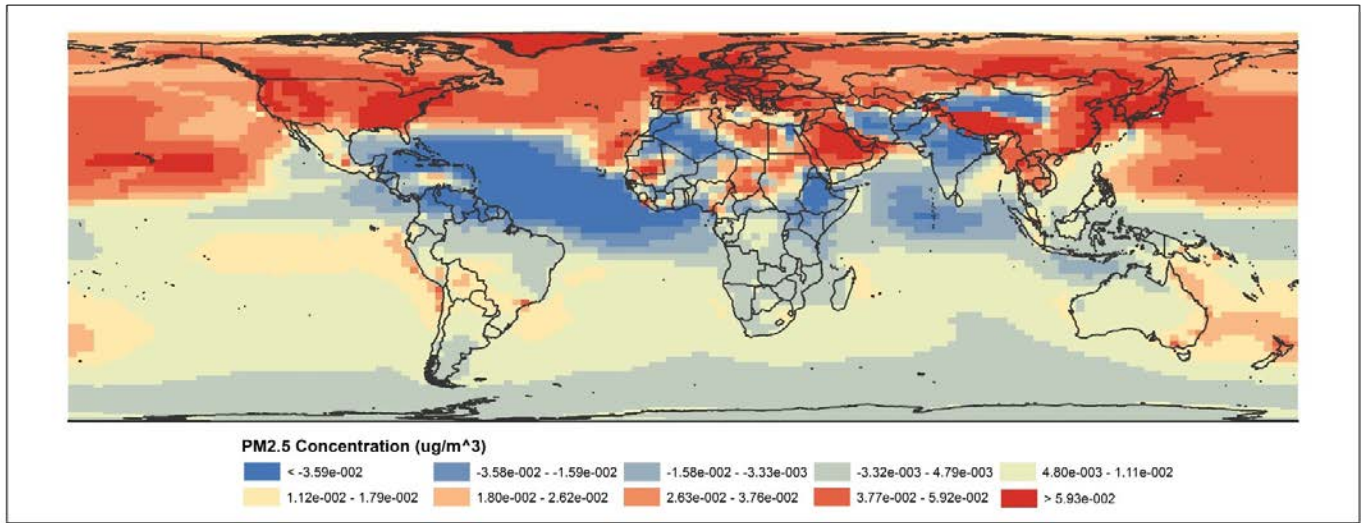

138 Shows global distribution of PM<sub>2.5</sub> concentrations due to aviation sector emissions. Much of the  
139 Atlantic and Indian Ocean, India, southern and parts of northwestern Africa, northwestern China,  
140 and parts of the Middle Eastern regions have negative PM<sub>2.5</sub> concentration values. The Pacific  
141 and Arctic Ocean, northeastern Africa, North America, eastern and southwestern China, and all  
142 of Europe have extremely high PM<sub>2.5</sub> concentrations under the 2050 ref scenario. Australia and  
143 South America have low PM<sub>2.5</sub> concentration levels.

144 Figure S3. Global Distribution of PM<sub>2.5</sub> Concentration Attributable to Aviation Sector (2050 Tech  
145 & Op)

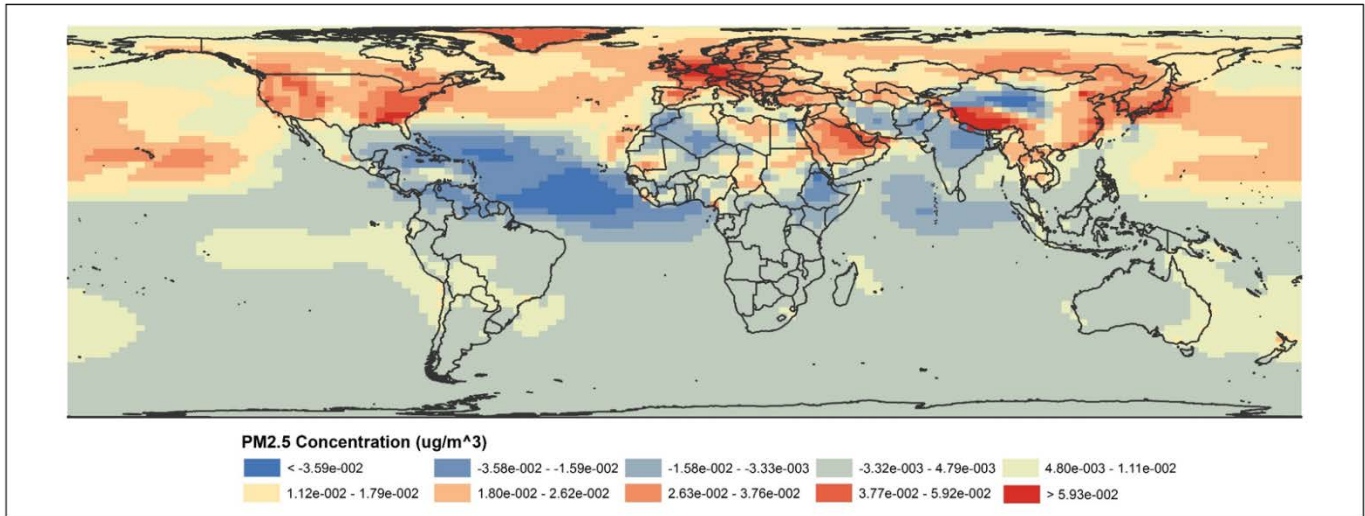

146 Shows global distribution of PM<sub>2.5</sub> concentrations due to aviation sector emissions. Much of the  
147 Atlantic and Indian Ocean, India, parts of northwestern Africa, northwestern China, and parts of  
148 the Middle Eastern regions have negative PM<sub>2.5</sub> concentration values. The Pacific and Arctic  
149 Ocean, North America, eastern and southwestern China, and all of Europe have high PM<sub>2.5</sub>  
150 concentrations under the 2050 Tech & Op scenario; however, lower concentration levels overall  
151 in these regions compared to the 2050 ref scenario. Australia, southern Africa, and South  
152 America have low PM<sub>2.5</sub> concentration levels.



153 Figure S4. Global Distribution of PM<sub>2.5</sub> Concentration Attributable to Aviation Sector (2050 Alt  
154 Fuel)

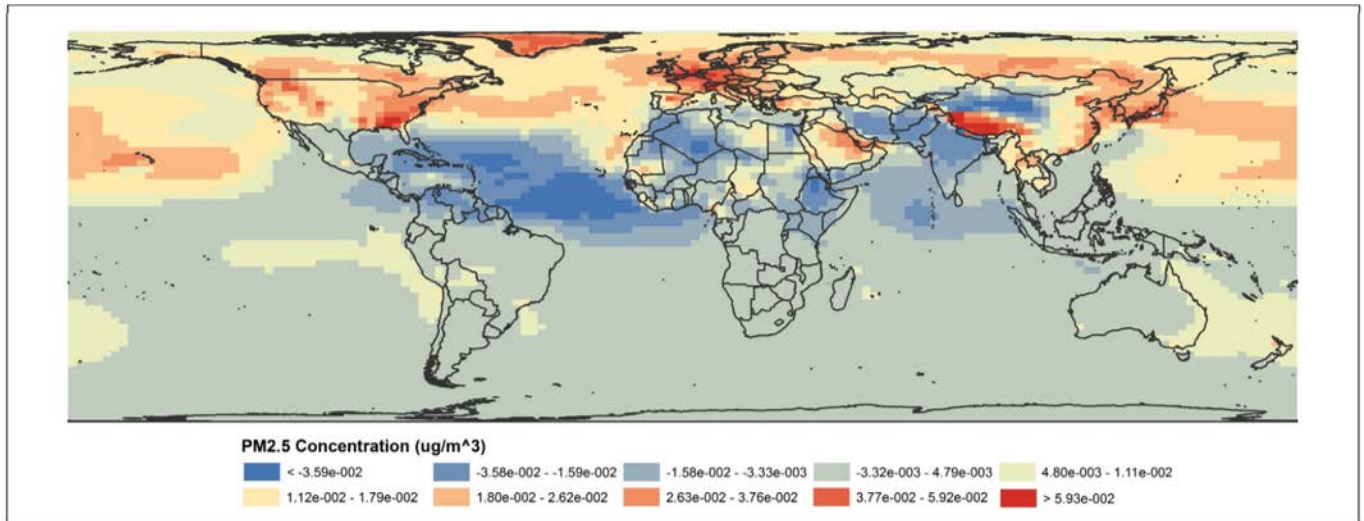

155 Shows global distribution of PM<sub>2.5</sub> concentrations due to aviation sector emissions. Much of the  
156 Atlantic and Indian Ocean, India, most of northern Africa, northwestern China, and parts of the  
157 Middle Eastern regions have negative PM<sub>2.5</sub> concentration values. The Pacific and Arctic Ocean,  
158 North America, eastern and southwestern China, western Europe, and parts of Russia have high  
159 PM<sub>2.5</sub> concentrations under the 2050 Tech & Op scenario; however, concentration levels are even  
160 lower overall in these regions compared to the 2050 Tech & Op scenario. Australia, southern  
161 Africa, and South America have low PM<sub>2.5</sub> concentration levels.
